# Supplementary material
Source: PubMed Central journal article supplement (PMC2689780)
Supplement: M800446-MCP200_1.pdf [file M800446-MCP200_1.pdf]

### Alexa-Ab

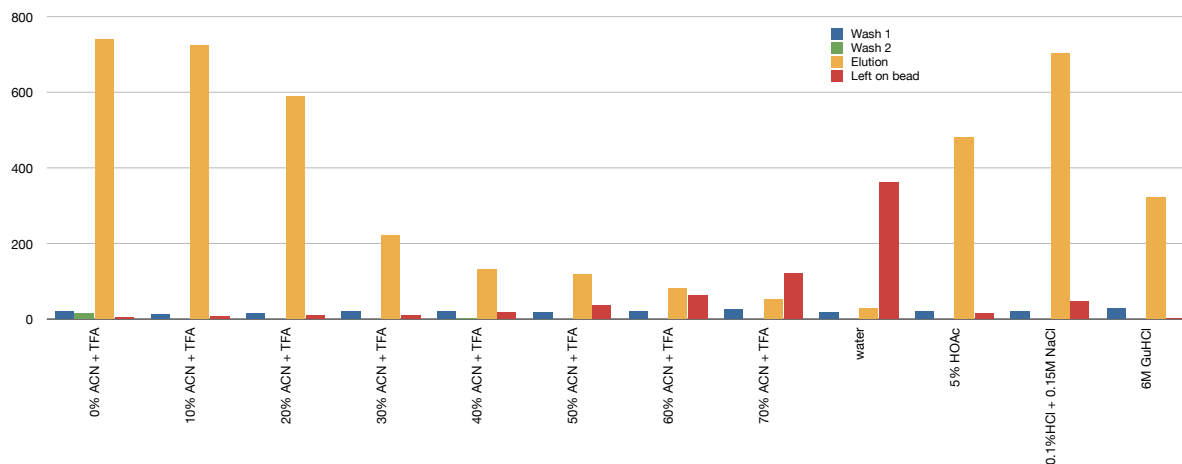

### Alexa-peptide

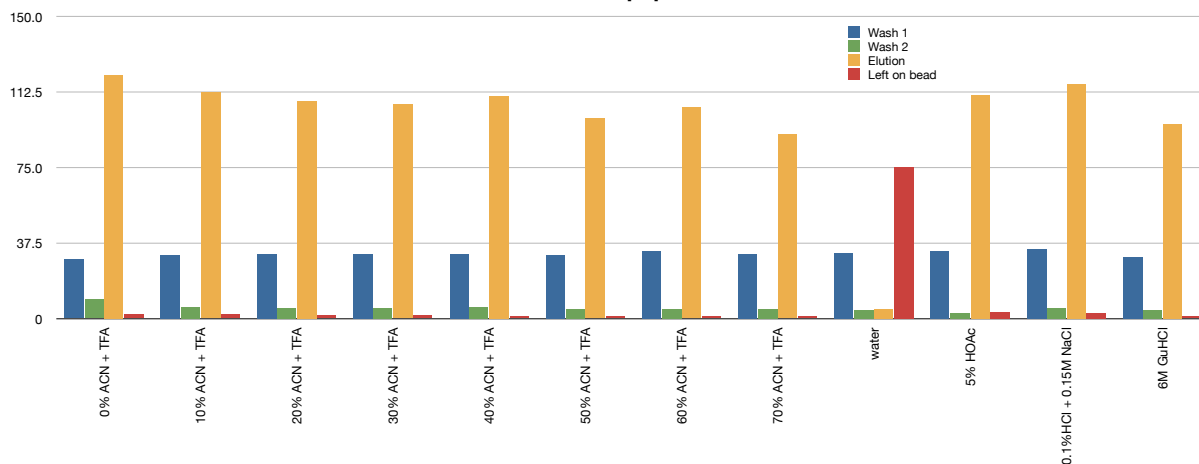

### Elution of Alexa-IgG and Alexa-peptide from Dynal G beads (Kingfisher)

Dynal G magnetic beads were loaded with Alexa488-labeled rabbit antibody (upper panel) or antibody to AAC peptide and Alexa-labeled AAC peptide (lower panel), and processed in the Kingfisher robot through two wash plates, an elution plate, and finally the beads were deposited in a plate with 0.2% SDS in 50mM Tris pH 7 (subsequently heated to 100C). The plates were read separately and are on different scales (due to the autoscaling nature of the plate reader). Stronger acids (0.1% TFA or 0.1% HCl) appear to elute more labeled Ab from the beads than the standard eluent 5% HOAc, and water elutes little or no Ab. Progressively increasing ACN in 0.1% TFA diminishes elution of labeled Ab while still eluting the bound labeled peptide 28-Aug-07 3rd read
